# Supplementary material for: Fundamental Insights on the Physical and Chemical Properties of Organosolv Lignin from Norway Spruce Bark
Source: PubMed Central journal article supplement (PMC9364314; doi:10.1021/acs.biomac.2c00457), 2022-07-11
Supplement: bm2c00457_si_001.pdf [file bm2c00457_si_001.pdf]

Supporting Information

# Fundamental insights on the physical and chemical properties of organosolv lignin from Norway spruce bark

*Barbara Rietzler, Maria Karlsson, Isabella Kwan, Martin Lawoko\*, and Monica Ek*

Division of Wood Chemistry and Pulp Technology, Department Fibre and Polymer  
Technology and Wallenberg Wood Science Centre (WWSC), School of Engineering Sciences  
in Chemistry, Biotechnology and Health (CBH), KTH Royal Institute of Technology,  
Teknikringen 56, SE-100 44 Stockholm, Sweden

\*Corresponding author: Martin Lawoko, lawoko@kth.se

Number of pages: 5

Number of figures: 4

Number of tables: 2

Number of schemes: 1

**Table S1.** Chemical composition of the raw bark and the residue after organosolv extraction (OSR) in % w/w and the yield of OSR in % w/w based on the initial mass of raw bark. The results are the average of at least 3 determinations and the corresponding standard deviation

| component                  | raw bark   | residue after organosolv extraction |
|----------------------------|------------|-------------------------------------|
| <b>Yield</b>               |            | 29.2 ± 1.6                          |
| <b>arabinose</b>           | 4.5 ± 0.03 | < 0.1                               |
| <b>rhamnose</b>            | 0.7 ± 0.03 | < 0.1                               |
| <b>galactose</b>           | 1.9 ± 0.03 | < 0.1                               |
| <b>glucose</b>             | 23.7 ± 0.7 | 63.9 ± 3.2                          |
| <b>xylose</b>              | 4.5 ± 0.4  | 1.3 ± 0.4                           |
| <b>mannose</b>             | 2.3 ± 0.2  | 0.8 ± 0.3                           |
| <b>galacturonic acid</b>   | 9.5 ± 0.6  | < 0.1                               |
| <b>glucuronic acid</b>     | 0.2 ± 0.07 | < 0.1                               |
| <b>Klason Lignin</b>       | 19.2 ± 0.4 | 24.8 ± 0.7                          |
| <b>acid soluble lignin</b> | 1.9 ± 0.3  | 2.2 ± 1.2                           |
| <b>extractives</b>         | 20.6 ± 1.1 | n.d.                                |
| <b>other</b>               | 11.1 ± 3.8 | 7.0 ± 5.8                           |

**Table S2.** Chemical composition of the subcritical water extracts at 100, 140 and 160°C in % w/w and the yield in % w/w based on the initial mass of raw bark. The results are the average of at least 3 determinations and the corresponding standard deviation

| component                  | 100°C      | 140°C      | 160°C      |
|----------------------------|------------|------------|------------|
| <b>Yield</b>               | 5.0 ± 0.3  | 8.0 ± 0.3  | 7.7 ± 2.0  |
| <b>arabinose</b>           | 5.1 ± 1.0  | 26.8 ± 2.3 | 19.2 ± 0.2 |
| <b>rhamnose</b>            | 1.2 ± 0.1  | 3.8 ± 0.1  | 3.2 ± 0.1  |
| <b>galactose</b>           | 5.0 ± 1.9  | 5.2 ± 0.8  | 5.8 ± 1.4  |
| <b>glucose</b>             | 12.1 ± 2.0 | 5.2 ± 1.7  | 6.5 ± 1.1  |
| <b>xylose</b>              | 0.6 ± 0.5  | 1.7 ± 0.6  | 7.9 ± 2.2  |
| <b>mannose</b>             | 1.5 ± 0.1  | 2.6 ± 0.1  | 4.1 ± 1.0  |
| <b>galacturonic acid</b>   | 7.6 ± 0.6  | 26.1 ± 3.1 | 10.6 ± 1.6 |
| <b>glucuronic acid</b>     | 0.8 ± 0.1  | 0.4 ± 0.2  | 0.4 ± 0.2  |
| <b>Klason Lignin</b>       | 21.3 ± 3.4 | 11.2 ± 0.7 | 11.7 ± 4.0 |
| <b>acid soluble lignin</b> | 3.9 ± 0.4  | 3.4 ± 0.7  | 3.7 ± 1.0  |

other

 $40.8 \pm 3.0$  $13.6 \pm 6.8$  $26.9 \pm 4.5$ 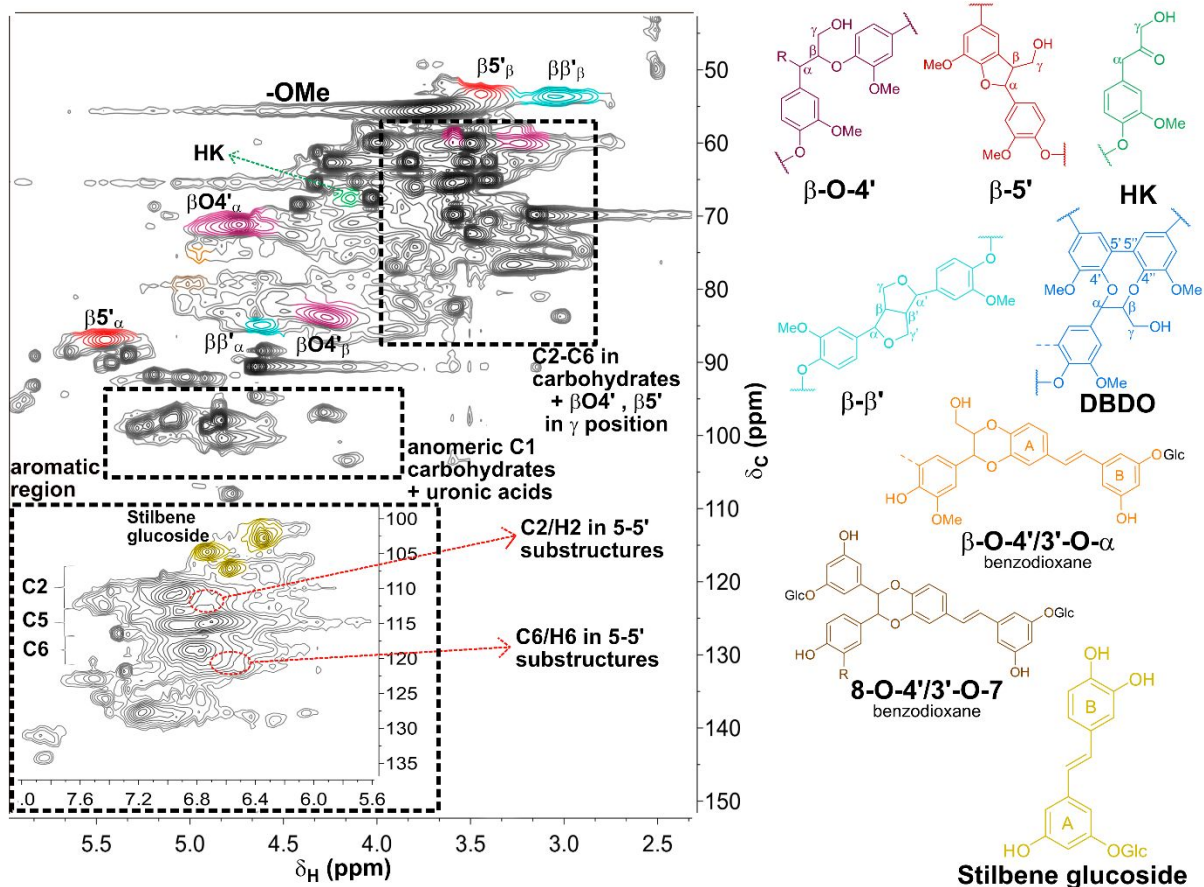

**Figure S1.** 2D HSQC NMR of milled bark lignin (MBL) from Norway spruce inner bark in dimethyl sulfoxide-*d*<sub>6</sub>. The main lignin inter-unit linkages are depicted to the right of the spectrum. β-O-4' aryl ethers; β-5' phenylcoumarans; β-β' resinols; 5-5' dibenzodioxocins (DBDO); Hibbert's ketone (HK); β-O-4'/3'-O-α benzodioxane structure formed through coupling of coniferyl alcohol and astringin; 8-O-4'/3'-O-7 benzodioxane structure formed by stilbene glucoside units; Stilbene glucoside

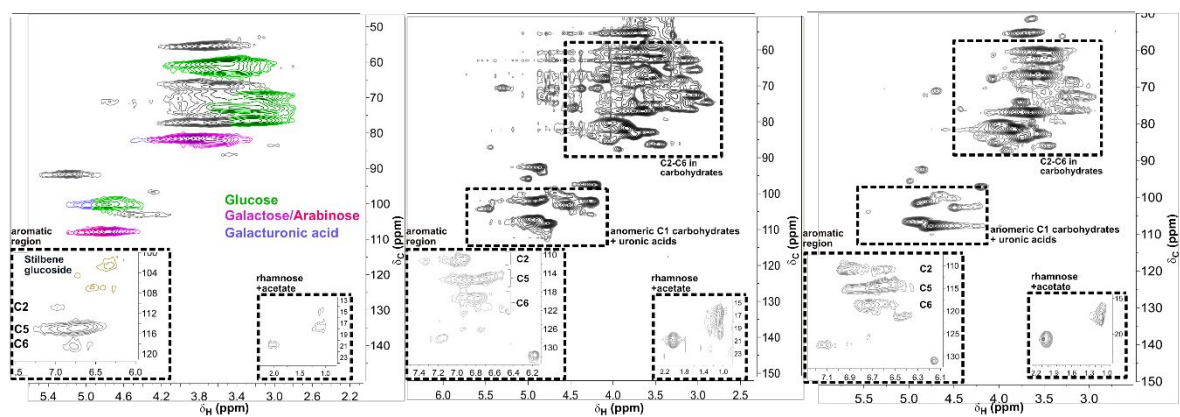

**Figure S2.** 2D HSQC NMR of subcritical water extracts at 100, 140 and 160°C in dimethyl sulfoxide-*d*<sub>6</sub>

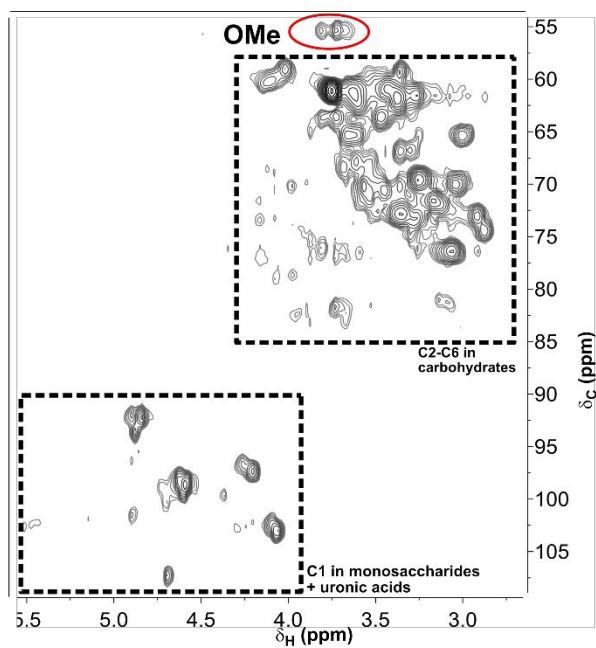

**Figure S3.** 2D HSQC NMR of polysaccharide-rich fraction after organosolv extraction in dimethyl sulfoxide-*d*<sub>6</sub>

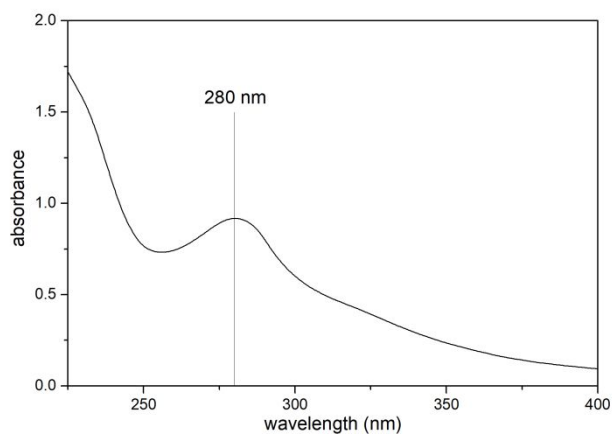

**Figure S4.** UV/Vis spectrum of polysaccharide-rich fraction after organosolv extraction between 225 nm and 400 nm

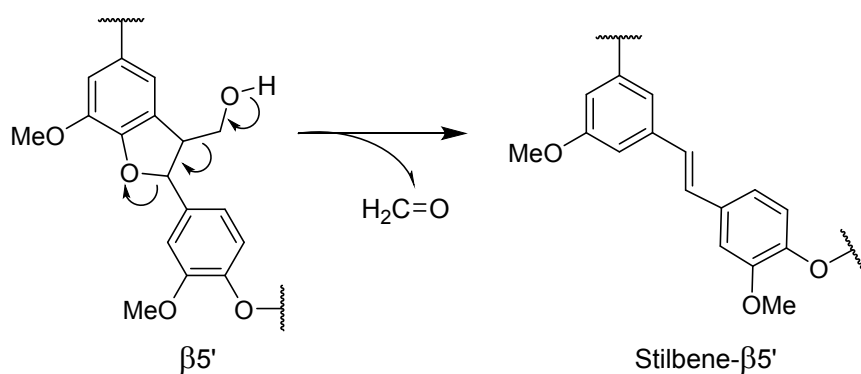

**Scheme S1.** Formation of stilbene- $\beta 1'$  and stilbene- $\beta 5'$  structures through elimination of formaldehyde
